# Supplementary material for: Assembly PCR synthesis of optimally designed, compact, multi-responsive promoters suited to gene therapy application
Source: PubMed Central journal article supplement (PMC4937410; doi:10.1038/srep29388), 2016-07-08
Supplement: srep29388-s1.pdf [file srep29388-s1.pdf]

## **Supplementary Material**

**Assembly PCR synthesis of optimally designed, compact, multi-responsive promoters suited to gene therapy application.**

**Mohamed H, Chernajovsky Y and Gould D**

## Supplementary Methods

Assembly PCR reactions were performed using the G-Storm Thermocycler (model GS482, Gene Technologies Limited, Essex, UK) and all oligonucleotides were manufactured by Sigma-Aldrich with standard desalting purification (listed in Supplementary Table 2). Each forward and reverse TFBS-oligonucleotide contained the core binding sites of NF- $\kappa$ B, HIF-1 $\alpha$  or AP-1 flanked by annealing sequences of 10 bp, 15 bp or 20 bp. Spacer reverse oligonucleotides contained 5 nt or 10 nt spacer sequences flanked by annealing sequences of 15 bp or 20 bp. The 5'-Stop-NheI primers and 3'-Stop-XhoI contained NheI and XhoI restriction enzyme sites, respectively and annealing sequences of 10 bp, 15 bp or 20 bp.

For the initial assembly (x10 cycle) PCR reaction, an oligonucleotide mix containing 5  $\mu$ l 100  $\mu$ M forward TFBS-oligonucleotide, 5  $\mu$ l 100  $\mu$ M reverse TFBS-oligonucleotide, 12.8  $\mu$ l 100  $\mu$ M 5'-Stop-NheI and 12.8  $\mu$ l 100  $\mu$ M 3'-Stop-XhoI oligonucleotides in a final reaction volume of 35.6  $\mu$ l, was diluted 1:100 in sterile distilled (d)H<sub>2</sub>O. A volume equal to the final reaction volume before dilution was added to the assembly PCR reaction e.g. 35.6  $\mu$ l diluted oligonucleotide mix was added to 12  $\mu$ l 5x Phusion HF Buffer (NEB), 6  $\mu$ l 2 mM dNTPs, 0.5  $\mu$ l Phusion DNA Polymerase (NEB) and sterile dH<sub>2</sub>O in a final volume of 60  $\mu$ l. The oligonucleotides were assembled into double stranded PCR products in a ten cycle PCR reaction using the thermocycler program: 95°C for 5 minutes, 10 cycles of 95°C for 30 seconds, 60°C for 45 seconds, 72°C for 45 seconds and an additional extension at 72°C for 2 minutes. The reaction was purified from excess dNTPs and free oligonucleotides using the PureLink<sup>®</sup> PCR Purification Kit (Invitrogen Corp., Paisley, UK) to yield the purified double stranded assembled PCR product which served as the template for the amplification PCR reaction (x25 cycles). The amplification reaction comprised 15  $\mu$ l of assembled PCR product, 10  $\mu$ l 5x Phusion HF Buffer, 0.5  $\mu$ l Phusion DNA Polymerase, 5  $\mu$ l 2 mM dNTPs, 5  $\mu$ l 10  $\mu$ M 5'-Stop-Nhe I, 5  $\mu$ l 10 $\mu$ M 3'-Stop-Xho I oligonucleotides and sterile dH<sub>2</sub>O to a final volume of 50  $\mu$ l. The PCR products were amplified using the thermocycler program: 95°C for 5 minutes, 25 cycles of 95°C for 30 seconds, 60°C for 45 seconds, 72°C for 45 seconds and an additional extension at 72°C for 5 minutes and then purified by two successive high cut-off PCR purification steps using the Binding Buffer HC provided in the PureLink<sup>®</sup> PCR Purification Kit (Invitrogen) to remove the amplification primers and failed PCR products <300bp. The purified PCR products were digested with Nhe I and Xho I and cloned into the compatible sites within pCpGmCMV (see below).

The PCR products required to generate the constructs with specific spacing between the proximal TFBS and the TATA box were assembled in four individual reactions comprising 5  $\mu$ l 100  $\mu$ M forward HRE-oligonucleotide, 5  $\mu$ l 100  $\mu$ M reverse HRE-oligonucleotide, 12.8  $\mu$ l 100  $\mu$ M 5'-Stop-Nhe I and 12.8  $\mu$ l 100  $\mu$ M of either 3'-Stop-XhoI-0 bp-SalI, 3'-Stop-XhoI-5 bp-Sal I, 3'-Stop-XhoI-9 bp-SalI or 3'-Stop-XhoI-14 bp-SalI-oligonucleotides (Supplementary Table 2). All oligonucleotides contained 20 bp annealing sequences and were assembled, amplified and purified as described above. The PCR products were digested with NheI and SalI and cloned into the NheI/XhoI compatible site within the pCpGmCMV vector to generate the pCpGmCMV-Xbp plasmids, where X bp denotes 0 bp, 5 bp, 9 bp or 14 bp space between the proximal TFBS and the TATA box.

## Cloning vectors and construction of synthetic promoters

The pGL3smCMV plasmid (33), containing the human small minimal CMV (mCMV) promoter, equivalent to -52 to -14 of the wild type CMV promoter (60) was digested with NheI and AfeI to isolate the mCMV promoter and firefly luciferase reporter gene (Luc<sup>+</sup>). The pCpG-mSEAP plasmid (InvivoGen, San Diego, CA, USA) was digested with NheI, SbfI and XbaI to isolate the fragment containing the nuclear matrix attachment regions from the 5'-portion of the human IFN- $\beta$  gene and  $\beta$ -globin gene. The digested fragments from pCpG-mSEAP and pGL3mCMV were ligated to generate the pCpGmCMV-Luc<sup>+</sup> construct, which was subsequently digested with NheI and XhoI, to form the pCpGmCMV cloning vector.

Annealed 66 bp-spacer oligonucleotides, containing 5'-XbaI and 3'-XhoI overhangs and an internal NheI restriction site (Supplementary Table 1), were cloned into the compatible NheI/XhoI site within the pCpGmCMV cloning vector and the resulting pCpGmCMV-66 bp plasmid was digested with NheI and dephosphorylated with Calf Intestinal Phosphatase, to form the pCpGmCMV-66 bp cloning vector. The forward and reverse oligonucleotides required for the random ligation cloning method contained the core binding sites of NF- $\kappa$ B, HIF-1 $\alpha$  or AP-1 with phosphorylated 5'-CTAG protruding end, compatible to the NheI cleaved end. The pCpG-4bp-composite synthetic promoters were constructed by the random ligation of annealed NF- $\kappa$ B, AP-1 and HIF-1 $\alpha$ -oligonucleotides, upstream of the mCMV promoter into the pCpGmCMV-66 bp vector to allow 4 bp space between the TFBSs and 66 bp between the proximal TFBS and the TATA box.

The pCpGmCMV-Xbp plasmids were digested with NheI and XhoI to form the pCpGmCMV-Xbp cloning vectors and the PCR products containing 8xAP-1 or 6xNF- $\kappa$ B were cloned into each cloning vector to allow 55 bp, 60 bp, 66 bp, 70 bp and 74 bp space between the proximal TFBS and the TATA box. The synthetic promoters with 15 bp-60 bp spacing between NF- $\kappa$ B or AP-1 motifs were created by assembling specific combinations of oligonucleotides (listed in Supplementary Table 2). The resulting NheI/XhoI digested PCR products into the pCpGmCMV-5 bp cloning vector, to allow 15 bp-60 bp space between the TFBSs and 66 bp between the proximal TFBS and the TATA box. The clustered composite promoters were assembled by selecting a promoter with the appropriate proximal cluster and digesting it with NheI followed by dephosphorylation and purification. Clusters of 6xNF- $\kappa$ B, 8xAP-1 and 6xHRE were then isolated from the appropriate vectors by digestion with NheI/XhoI, these clusters were then gel purified and two were randomly cloned into the appropriate dephosphorylated vector with the third cluster proximal to the core promoter. The pCpG-20 bp-composite synthetic promoters were constructed by cloning the PCR products, containing NheI and XhoI cleaved ends, into the equivalent sites within the pCpGmCMV-5 bp cloning vector, to allow 20 bp space between the TFBSs and 66 bp between the proximal TFBS and the TATA box.

All pCpGmCMV plasmid constructs were transformed into chemically-competent GT115 cells and selectively grown in 25  $\mu$ g/ml Zeocin whilst pGL3mCMV and pRL-CMV (Promega Corp.) plasmid constructs were propagated in chemically-competent DH5 $\alpha$  cells and selectively grown in the presence of 100 $\mu$ g/ml carbenicillin. Plasmid DNA was isolated from positive bacterial transformants using the PureLink<sup>®</sup> Quick Plasmid Miniprep or HiPure Maxiprep Kits (Invitrogen) and the selected pCpGmCMV-synthetic promoter plasmids were confirmed by DNA sequencing (Genome Centre, QMUL, UK or GATC-Biotech AG, Germany) and/or restriction digestion.

## Construction of lentiviral vectors expressing luciferase

The HIV-1 based, 3'LTR self-inactivating (SIN) lentiviral plasmid pLV.CMVenh.gp91.eGFP.cHS4 (Addgene plasmid 30471; Barde *et al.*, 2011) was digested with BamHI and Sall to release the GFP gene and create the LV.CMV cloning vector. The forward and reverse PCR primers; 5'-GATGAGCAGGATCCCATGGAAGACG-3' and 5'-ATGTACGCGTCGACTCTAGAATTAC-3', containing BamHI and Sall restriction enzyme sites (underlined) respectively, were used to amplify the luciferase gene from pCpGmCMV-Luc<sup>+</sup>. The PCR product was digested with BamHI and Sall and cloned into the corresponding site within the pLV.CMV cloning vector to incorporate the luciferase gene and create the pLV.CMV.Luc<sup>+</sup> plasmid. The CMV promoter and the 5'-portion of the luciferase gene were removed from the LV.CMV.Luc<sup>+</sup> plasmid by digestion with PmeI and BstBI to create the LV.Luc<sup>+</sup> cloning vector. The candidate synthetic promoters and the 5'-portion of the luciferase gene were amplified from their respective pCpG-20 bp-composite promoter constructs using the forward and reverse PCR primers; 5'-GTCGGATTATCGATGCTAGCGTGCC-3' and 5'-ACTCGTAGTTCGAAGTACTCAGCGT-3', containing ClaI and BstBI restriction enzyme sites (underlined), respectively. The mCMV promoter and the 5'-portion of the luciferase gene were amplified from pGL3mCMV using the forward PCR primer; 5'-GTCGGATTATCGATGCGTGCTAGC-3' and the above reverse primer. All PCR products were digested with ClaI and the 5'-end of the DNA was blunted by incubation with Klenow fragment of DNA polymerase and subsequently digested with BstBI. The PCR products were cloned into the PmeI/BstBI within the LV.Luc<sup>+</sup> cloning vector to restore the luciferase gene and incorporate the candidate synthetic promoters or the mCMV negative control promoter to create LV.2.Luc<sup>+</sup>, LV.9.Luc<sup>+</sup> and LV.mCMV.Luc<sup>+</sup> transfer plasmids, respectively. The pUCL-Luc<sup>+</sup> plasmid (61) was digested with EcoRI and incubated with Klenow to generate 5'-blunt ended DNA, which was digested with BstBI to release the constitutive SFFV promoter and the 5'-portion of the luciferase gene. The resulting fragment was cloned into the compatible PmeI/BstBI site within the LV.Luc<sup>+</sup> cloning vector to create the LV.SFFV.Luc<sup>+</sup> positive control transfer plasmid.

## Production of lentiviruses and transduced cell lines.

Human 293T cells ( $9 \times 10^6$ ) were seeded in complete DMEM medium in a 15 cm<sup>2</sup> tissue culture dish and transiently transfected with three plasmids using polyethyleneimine (PEI) the following day: 18µg of transfer plasmid (above), 18µg of packaging plasmid pCMVΔR8.2 (62), 4µg vesicular-stomatitis virus glycoprotein (VSV-G) envelope plasmid pMD.G (63) were added to OptiMEM medium (Invitrogen) in a final volume of 1ml. Polyethyleneimine (PEI; Sigma Aldrich) was diluted by combining 200µl PEI and 800µl of OptiMEM medium and the DNA:PEI complex was formed by incubating the DNA solution with the diluted PEI for 10 minutes at room temperature. A final concentration of 25 µg/ml chloroquine was added to the cells one hour prior to transfection, after which the transfection mix (2 ml) was added in a drop-wise manner to the 293T cells and incubated at 37°C in 5% CO<sub>2</sub> overnight. The cell medium was replaced with complete DMEM medium the following day and after 72 hours post-transfection, the cell medium containing the packaged lentiviruses were collected and filtered through 0.45µm filters to remove cell debris. The lentiviruses were harvested and concentrated by ultracentrifugation in a Beckman XL-90 Ultracentrifuge (Beckman Coulter, CA, USA) at 23,000 rpm, 4°C for 2 hours and the lentivirus pellets were resuspended in DMEM medium and stored at -80°C. The Lenti-X™ p24 Rapid Titer Kit (Clontech Laboratories, CA, USA) was used to quantify the p24 antigen and therefore, the total viral titre, in

the concentrated lentivirus preparations as per the manufacturer's instructions. The titres obtained were in the range  $3.3 \times 10^7$  to  $3 \times 10^8$  IFU/ml

|                     | Oligonucleotide Sequences (5'-3')     |
|---------------------|---------------------------------------|
| AP-1 Forward Oligo  | 5'- <u>CTAG</u> <b>TGAGTCA</b> -3'    |
| AP-1 Reverse Oligo  | 5'- <u>CTAG</u> <b>TGACTCA</b> -3'    |
| HRE Forward Oligo   | 5'- <u>CTAG</u> <b>ACGTGC</b> -3'     |
| HRE Reverse Oligo   | 5'- <u>CTAG</u> <b>GACAGT</b> -3'     |
| NF-κB Forward Oligo | 5'- <u>CTAG</u> <b>GGGACTTTCC</b> -3' |
| NF-κB Reverse Oligo | 5'- <u>CTAG</u> <b>GGAAAGTCCC</b> -3' |

**Supplementary Table 1. List of TFBS-oligonucleotides used to construct the pCpG-4bp-composite synthetic promoter constructs.** Overhangs are underlined and TFBSs are highlighted in bold.

|                                  |                                                                                |
|----------------------------------|--------------------------------------------------------------------------------|
| Fixed NFκB- 30 bp Forward primer | 5'-ATCTCTGCGATGAACCTCACCATGT <b>GGGACTTTCC</b> ACAAGGTGCCTCTTATGATCTGGAT-3'    |
| Fixed NFκB- 30 bp Reverse primer | 5'- GTGAGGTTTCATCGCAGAGATCTTGT <b>GGAAAGTCCC</b> CACATGATCCAGATCATAAGAGGCAC-3' |
| Fixed NFκB- 20 bp Forward primer | 5'-ATCTCTGCGATGAACCTCAC <b>GGGACTTTCC</b> GTGCCTCTTATGATCTGGAT-3'              |
| Fixed NFκB- 20 bp Reverse primer | 5'- GTGAGGTTTCATCGCAGAGAT <b>GGAAAGTCCC</b> ATCCAGATCATAAGAGGCAC-3'            |
| Fixed NFκB- 15 bp Forward primer | 5'-TGCGATGAACCTCAC <b>GGGACTTTCC</b> GTGCCTCTTATGATC-3'                        |
| Fixed NFκB- 15 bp Reverse primer | 5'- GTGAGGTTTCATCGC <b>GGAAAGTCCC</b> GATCATAAGAGGCAC-3'                       |
| Fixed AP-1- 30 bp Forward primer | 5'-ATCTCTGCGATGAACCTCACCATGTT <b>TGAGTCA</b> ACAAGGTGCCTCTTATGATCTGGAT-3'      |
| Fixed AP-1- 30 bp Reverse primer | 5'- GTGAGGTTTCATCGCAGAGATCTTGT <b>TGACTCA</b> ACATGATCCAGATCATAAGAGGCAC-3'     |
| Fixed AP-1- 20 bp Forward primer | 5'-ATCTCTGCGATGAACCTCACT <b>TGAGTCA</b> GTGCCTCTTATGATCTGGAT-3'                |
| Fixed AP-1- 20 bp Reverse primer | 5'- GTGAGGTTTCATCGCAGAGATT <b>TGACTCA</b> ATCCAGATCATAAGAGGCAC-3'              |
| Fixed AP-1- 15 bp Forward primer | 5'-TGCGATGAACCTCACT <b>TGAGTCA</b> GTGCCTCTTATGATC-3'                          |
| Fixed AP-1- 15 bp Reverse primer | 5'- GTGAGGTTTCATCGCAT <b>TGACTCA</b> GATCATAAGAGGCAC-3'                        |
| Fixed HRE- 20 bp Forward primer  | 5'-ATCTCTGCGATGAACCTCAC <b>ACGTGCGTGCCTCTTATGATCTGGAT</b> -3'                  |
| Fixed HRE- 20 bp Reverse primer  | 5'-GTGAGGTTTCATCGCAGAGAT <b>GCACGT</b> ATCCAGATCATAAGAGGCAC-3'                 |
| Fixed HRE- 15 bp Forward primer  | 5'-TGCGATGAACCTCAC <b>ACGTGCGTGCCTCTTATGATC</b> -3'                            |

|                                          |                                                                     |
|------------------------------------------|---------------------------------------------------------------------|
| Fixed HRE- 15 bp<br>Reverse primer       | 5'-GTGAGGTTTCATCGCAG <b>CACG</b> TGATCATAAGAGGCAC-3'                |
| Fixed HRE- 10 bp<br>Forward primer       | 5'-TGAACCTCAC <b>ACGTGGG</b> TGCCTCTTA-3'                           |
| Fixed HRE- 10 bp<br>Reverse primer       | 5'- GTGAGGTT <b>CAGCACG</b> TTAAGAGGCAC-3'                          |
| 5nt Spacer -20 bp<br>Reverse primer      | 5'- GTGAGGTTTCATCGCAGAGAT <b>CATGG</b> ATCCAGATCATAAGAGGCAC-3'      |
| 5nt Spacer -15 bp<br>Reverse primer      | 5'- GTGAGGTTTCATCGC <b>CATGG</b> ATCATAAGAGGCAC-3'                  |
| 10nt Spacer -20 bp<br>Reverse primer     | 5'- GTGAGGTTTCATCGCAGAGAT <b>ACAGACATGG</b> ATCCAGATCATAAGAGGCAC-3' |
| 10nt Spacer -15 bp<br>Reverse primer     | 5'- GTGAGGTTTCATCGCA <b>ACAGACATGG</b> ATCATAAGAGGCAC-3'            |
| 5'- Stop-NheI<br>20 bp primer            | 5'-CAGTTGCTAGCGTGCCTCTTATGATCTGGAT-3'                               |
| 5'- Stop-NheI<br>15 bp primer            | 5'-CAGTTGCTAGCGTGCCTCTTATGATC-3'                                    |
| 5'- Stop-NheI<br>10 bp primer            | 5'-CAGTTGCTAGCGTGCCTCTTA-3'                                         |
| 3'- Stop-XhoI<br>20 bp primer            | 5'-GGATTCTCGAGATCCAGATCATAAGAGGCAC-3'                               |
| 3'- Stop-XhoI<br>15 bp primer            | 5'-GGATTCTCGAGATCATAAGAGGCAC-3'                                     |
| 3'- Stop-XhoI<br>10 bp primer            | 5'-GGATTCTCGAGTAAGAGGCAC-3'                                         |
| 3'- Stop-XhoI- 0bp-SalI<br>20 bp primer  | 5'-GGATTGTCGACTCGAGATCCAGATCATAAGAGGCAC-3'                          |
| 3'- Stop-XhoI- 5bp-SalI<br>20 bp primer  | 5'-GGATTGTCGACCATGGCTCGAGATCCAGATCATAAGAGGCAC-3'                    |
| 3'- Stop-XhoI- 9bp-SalI<br>20 bp primer  | 5'-GGATTGTCGACCAGACATGGCTCGAGATCCAGATCATAAGAGGCAC-3'                |
| 3'- Stop-XhoI- 14bp-SalI<br>20 bp primer | 5'-GGATTGTCGACGGATACAGACATGGCTCGAGATCCAGATCATAAGAGGCAC-3'           |

**Supplementary Table 2. List of oligonucleotides used for the Assembly PCR method.** TFBSs are highlighted in bold. The Nhe I, Xho I or Sal I restriction sites within the 'Stop' oligonucleotides are underlined.

## Supplementary Results

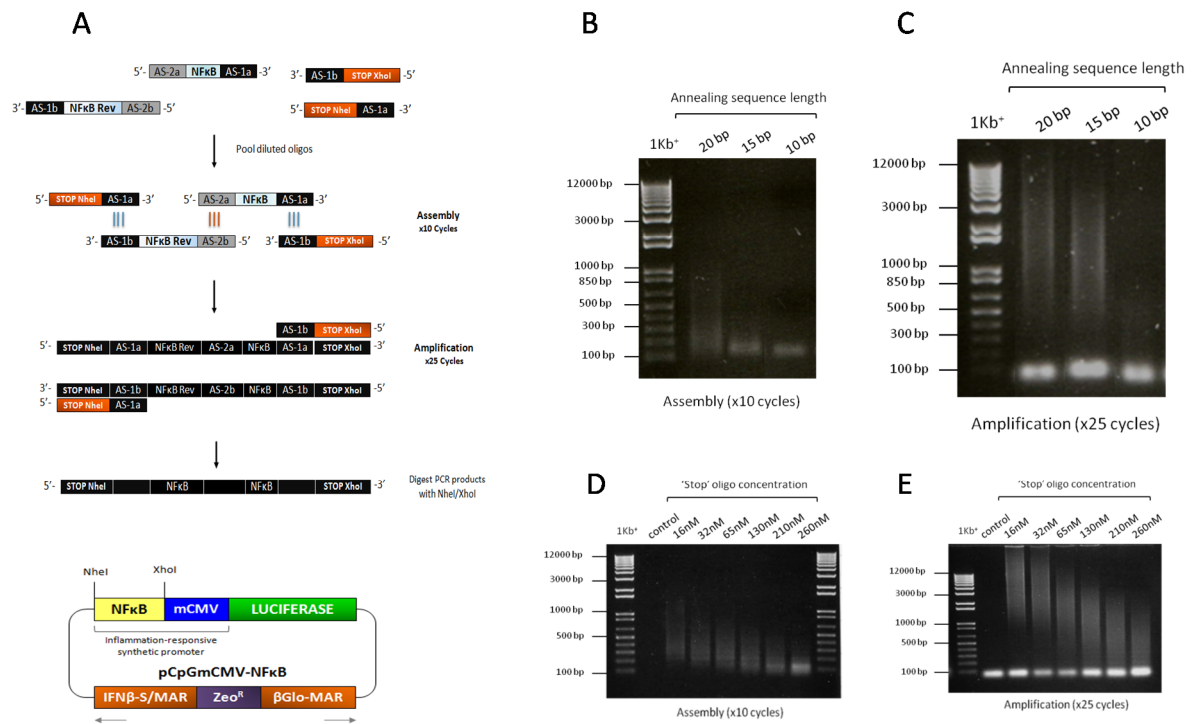

**Supplementary Figure 1. Schematic representation of assembly PCR and electrophoresis of obtained products.** The stages of synthetic promoter synthesis by assembly PCR include assembly, amplification, and restriction digest with NheI and XhoI prior to cloning into vector pCpGmCMV, these steps are schematically represented in A. The effect of annealing sequence length on the annealing and amplification products are illustrated in B and C respectively and the effect of increasing the 'stop' oligonucleotide concentration in the annealing reaction on assembly and amplification products is shown in D and E respectively.

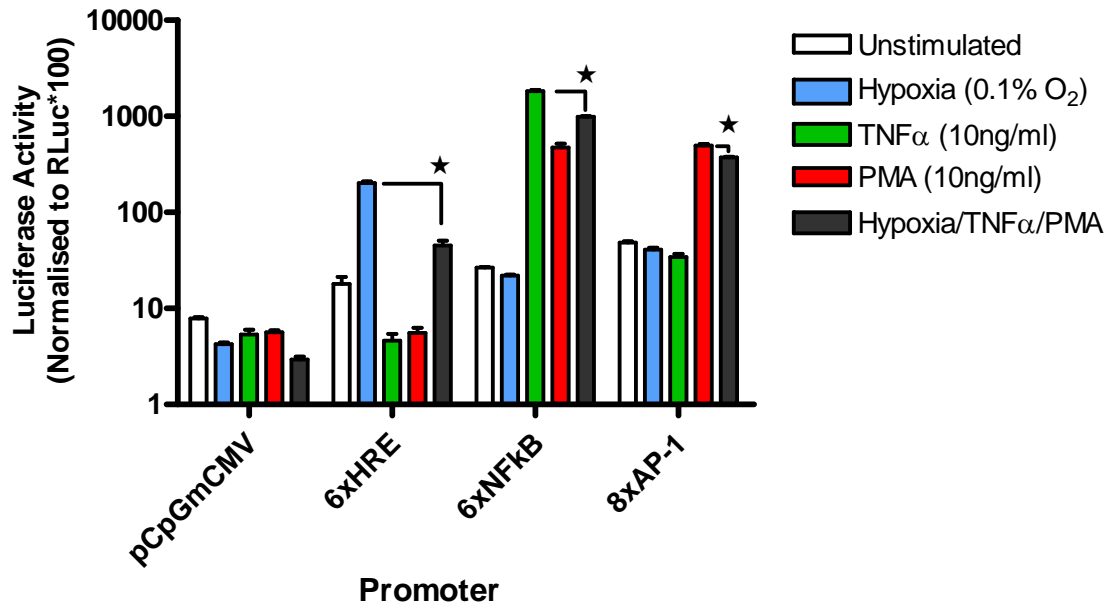

**Supplementary Figure 2. Reduced function of optimally arranged singularly responsive promoters following multiple stimulation.** The responsiveness of each promoter to stimulation was analysed by 1 way ANOVA (within each promoter) which showed significant differences. A post-hoc Šidak test was then performed to determine when the activity with combined stimulation (grey bars) was significantly ( $p < 0.05$ ) lower than the highest activation caused by an individual stimuli this is indicated by ★.



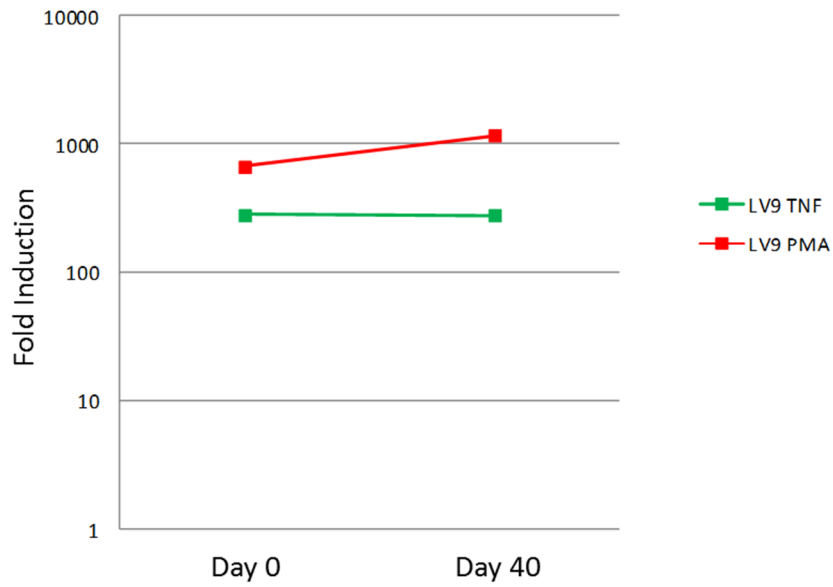

**Supplementary Figure 3. Retained promoter activity in transduced cells.** Promoter function in lentivirally transduced cells was stable over the 40 day period that cells were maintained in tissue culture.

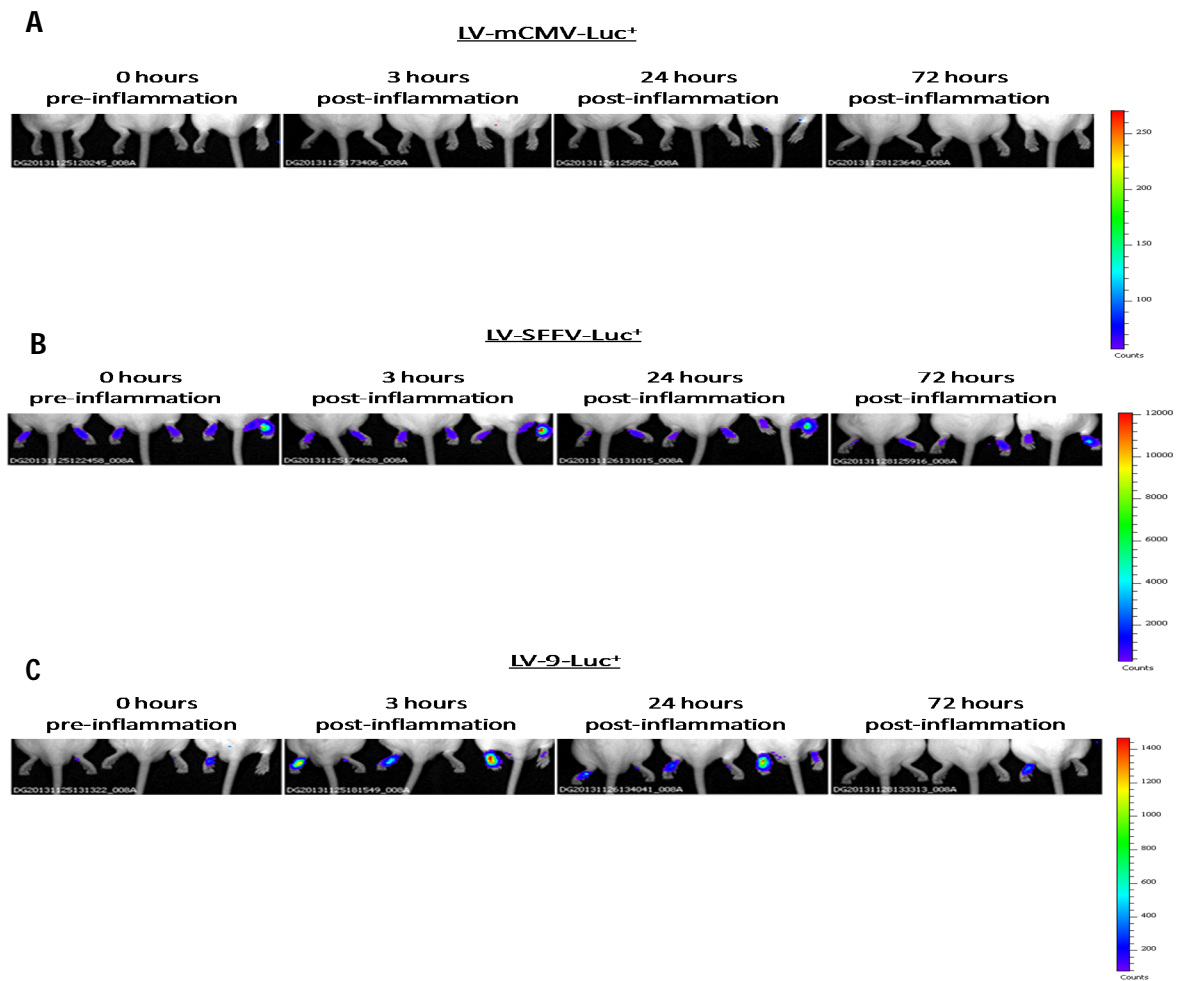

**Supplementary Figure 4.** *In vivo* bioluminescent imaging of promoter activity. The promoters mCMV (A), SFFV (B) and promoter 9 (C) were delivered to both hind paws in lentiviral vectors in which the drive expression of luciferase. Inflammation was induced in the left hind paw by injection of  $\lambda$ -carrageenan whilst the right hind paw was injected with saline. Groups of 3 animals were used for each promoter and sequential images were collected prior to, and 3, 24 and 72 hours after induction of paw inflammation. Images were collected from above with the anaesthetised mice in a normal posture but with their hind paws exposed.

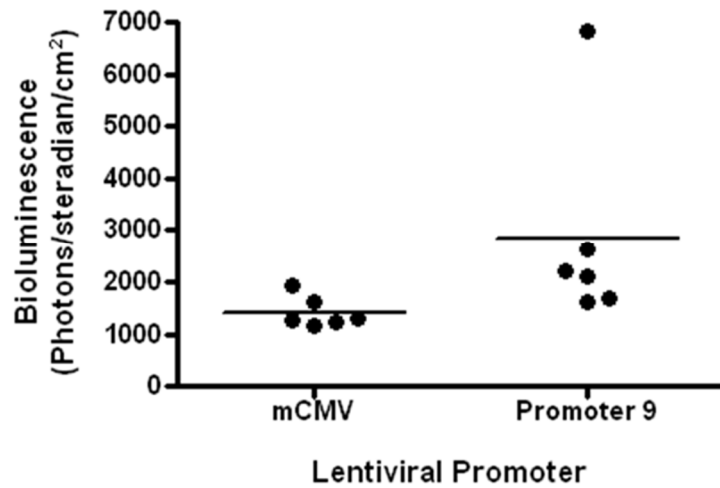

**Supplementary Figure 5.** Basal promoter activity *in vivo*. Basal promoter activity was determined in all paws by bioluminescent imaging prior to induction of inflammation and was not significantly ( $p > 0.05$ ) different when assessed by the student T test.

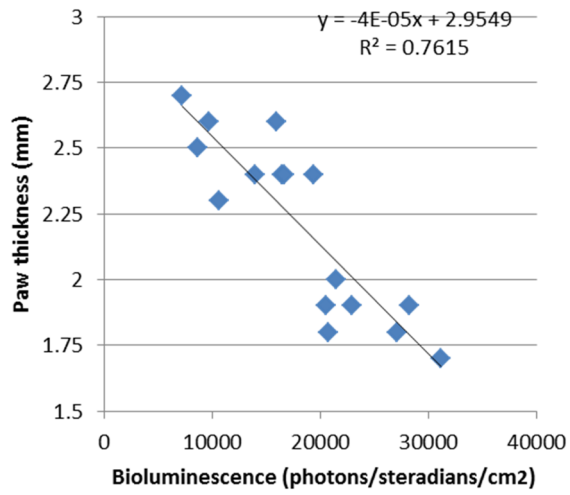

**Supplementary Figure 6. Relationship between paw thickness and bioluminescence.** Activity of the constitutive SFFV promoter demonstrates that there is a strong negative correlation with paw thickness when assessed at all time points.

## Appendix

### Composite promoter sequences

**Key:** **Bold text** – TATAA box

Underlined text – Restriction site

Boxed text – TFBS

**Boxed bold text** – TFBS error

Double underlined text – spacing error

### Compact 4bp Composite Promoters

#### Promoter 2

AAACCTCCCACACMTCCCCCTGAACCTGAAACATAAAAATGAATGCAATTGTTGTTGTTAACTTGTTTATTGCAG  
CTTATAATGGTTACAAATAAAGCAATAGCATCACAAATTTACAAATAAAGCATTMTTTCCTGACTGCATTCTAGTT  
GTGGTTTGTCCAAACTCATCAATGTATCTTATCATGTCTGGCCAGCTAGCCCGGGCTCGAGGCCTGTAGGCGT  
GTACGGTG GGAGGCTTATAAGCAGAGCTCAAGCTGGCATCCGGTACKTKAAGCMAC A

#### Promoter 4

GCGRAAAAA AAAACAGATA AAAGTAARTC AAACATATAT CCTGCWACWCGCGCGKATGT CGGTCATCRT  
GTSYCGCCCM RKGTMCGYST SCWGTRCSTCCCTAGTGACT CACTAGGGGA CTTTCCCTAGGCACGTCTAG  
GCACGTCTAGTGAGTCACTAGGCACGTCTAGCTCGCGATCTTATGATCTGGATCCATGCTCGAGGCCTGTAGG  
CGTGAC GGTGGGAGGC TTAT**TATAAGC** AGAGCTCAAGCTGGCATCCG TACKTGAGCC AT

#### Promoter 6

GCATCACAAATTTACAAATAAAGCATTMTTTCCTGACTGCATTCTAGTTGTGGTTTGTCCAAACTCATCAATGTAT  
CTTATCATGTCTGGCCAGCTAGACGCGTGCTAGGGAAAGTCCCCTAGACGTGCGGAAAGTCCCCTAGGCACG  
TCTAGTGAGTCAC TAGGGGACTTTCCCTAGTGACTCACTAGTGACTCACTAGCTCGCGATCTTATGATCTGGA  
TCCATGCTCG AGGCCTGTAG GCGTGTACGGTGGGAGGCTT **ATATAAGCAG** AGCTCAAGCT GGCATCCGGT  
ACKKGRAGCC

#### Promoter 7

TTATAATGGTTACAAATAAAGCAATAGCATCACAAATTTACAAATAAAGCATTMTTTCCTGACTGCATTCTAGTTG  
TGGTTTGTCCAAACTCATCAATGTATCTTATCATGTCTGGCCAGCTAGACGCGTGCTAGGGAAAGTCCCCTAG  
ACGTGCCTAGGCACGTCTAGTGAGTCACTAGACGTGCCTAGACGTGCCTAGACGTGCCTAGACGTGCCTAGCTCGCGATCTT  
ATGATCTGGATCCATGCTCGAGGCCTGTAGGCGTGACGGTGGGAGGCTT**ATATAAGCAGAGCTCAAGCTTG**  
GCATCCGG

### Promoter 8

WGRKTCCTSCRCACCTCCCSTGAACCTGAAACATAAAATGAATGCAATTGTTGTTGTTAACTTGTTTATTGCA  
GCTTATAATGGTTACAAATAAAGCAATAGCATCACAAATTCRCAAATAAAGCATTMTTTCCTACTGCATTCTAGT  
TGTGGTTTGTCCAAACTCATCAATGTATCTTATCATGTCTGGCCAGCTAGACGCGTGCTAGTGAGTCACTAGAC  
GTGCCTAGGCACGTCTAGCTCGCGATCTTATGATCTGGATCCATGCTSGAGGCCTGTAGGCGGTACGGTGG  
GAGGCTTATATAAGCAGAGCTCAAGCTKGCATCCGTACGTTKAGCCMMCCC

### Promoter 9

TTATAATGGTTACAAATAAAGCAATAGCATCACAAATTCACAAATAAAGCATTMTTTCCTACTGCATTCTAGTTG  
TGGTTTGTCCAAACTCATCAATGTATCTTATCATGTCTGGCCAGCTAGACGCGTGCTAGTGACTCACTAGGGA  
AAGTCCCCTAGTGACTCACTAGACGTGCCTAGGCACGTCTAGTGACTCACTAGCTCGCGATCTTATGATCTGG  
ATCCATGCTCGAGGCCTGTAGGCGGTACGGTGGGAGGCTTATATAAGCAGAGCTCAAAGCTGGCATCCGTA

### Promoter 10

TTATAATGGTTACAAATAAAGCAATAGCATCACAAATTCACAAATAAAGCATTMTTTCCTACTGCATTCTAGTTG  
TGGTTTGTCCAAACTCATCAATGTATCTTATCATGTCTGGCCAGCTAGACGCGTGCTAGGGAAAGTCCCCTAG  
GCACGTCTAGGCACGTCTAGGGGACTTTCCCTAGTGACTCACTAGACGTGCCTAGACGTGCCTAGTGACTCA  
CTAGGCACGTCTAGACGTGCCTAGGCACGTCTAGGCACGTCTAGGGGACTTTCCCTAGTGACTCACTAGGCA  
CGTCTAGGCACGTCTAGTGACTCACTAGTGACTCACTAGGGGACTTTCCCTAGTGAGTCACTAGTGACTCAC  
TAGGCACGTCTAGTGACTCACTAGCTCGCGATCTTATGATCTGGATCCATGCTCGAGGCCTGTAGGCGGTAC  
GGTGGGAGGCTTATATAAGCAGAGNTCAAGCTGGCATTCCGTAC

### Promoter 11

TTTACAAATAAAGCATTMTTTCCTACTGCATTCTAGTTGTGGTTTGTCCAAACTCATCAATGTATCTTATCATGTC  
TGGCCAGCTAGACGCGTGCTAGGGGACTTTCCCTAGGCACGTCTAGTGACTCACTAGGGGACTTTCCCTAGA  
CGTGCCTAGTGA GTCCTAGCT CGCGATCTTA TGATCTGGATCCATGCTCGAGGCCTGTAGGCGGTACGGT  
GGGAGGCTTA TATAAGCAGA GCTCAAGCTTGGCATCCGGT ACKTKKAGCC ACTA

### Promoter 12

TTATAATGGTTACAAATAAAGCAATAGCATCACAAATTCACAAATAAAGCATTMTTTCCTACTGCATTCTAGTTG  
TGGTTTGTCCAAACTCATCAATGTATCTTATCATGTCTGGCCAGCTAGACGCGTGCTAGTGACTCACTAGGGA  
AAGTCCCCTAGACGTGCCTAGTGACTCACTAGGGGACTTTCCCTAGACGTGCCTAGACGTGCCTAGTGACTC  
ACTAGTGAGTCACTAGGGAAAGTCCCCTAGCTCGCGATCTTATGATCTGGATCCATGCTCGAGGCCTGTAGG  
CGGTACGGTGGGAGGCTTATATAAGCAGAGCTCAAGCTGGCATTCCGTA

### Promoter 14

TACCAACAGTACCGGAATGCCAAGCTTGAGCTCTGCTTATATAAGCCTCCCACCGTACACGCCTACAGGCCTCG  
AGCATGGATCCAGATCATAAGATCGCGAGCTAGTGACTCACTAGTGACTCACTAGTGAGTCACTAGTGAGTC  
ACTAGCTCGCGATCTTATGATCTGGATCCATGCTCGAGGCCTGTAGGCGGTACGGTGGGAGGCTTATATAA  
GC AGAGCTCAAG CTGGCATCCGGTACKKRASC MAGTAC

### Promoter 15

AAACCTCCCACACCTCCCCCTGAACCTGAAACATAAAATGAATGCAATTGTTGTTGTTAACTTGTTTATTGCAGC  
TTATAATGGTTACAAATAAAGCAATAGCATCACAAATTTACAAATAAAGCATTTTTTTCACTGCATTCTAGTTG  
TGGTTTGTCCAAACTCATCAATGTATCTTATCATGTCTGGCCAGCTAGACGCGTGCTAGGCACGTCTAGTGAG  
TCACTAGGGGACTTTCCCTAGCTCGCGATCTTATGATCTGGATCCATGCTCGRGGCCTGTAGGCGGTACGGT  
GGAGGCTTATATA AGCAGAGCTCAAGCTGGCATCCGGTACKTGAGCCACCC

### Promoter 17

AAATAAAGCAATAGCATCACAAATTTACAAATAAAGCATTTTTTTCACTGCATTCTAGTTGTGGTTTGTCCAAA  
CTCATCAATGTATCTTATCATGTCTGGCCAGCTAGACGCGTGCTAGGGGACTTTCCCTAGGCACGTCTAGTGA  
CTCACTAGGGGACTTTCCCTAGACGTGCCTAGTGAGTCACTAGCTCGCGATCTTATGATCTGGATCCATGCTC  
GAGGCTGTAGGCGGTACGGTGGGAGGC

### Promoter 19

AACCTCCCACACCTCCCCCTGAACCTGAAACATAAAATGAATGCAATTGTTGTTGTTAACTTGTTTATTGCAGCT  
TATAATGGTTACAAATAAAGCAATAGCATCACAAATTTACAAATAAAGCATTTTTTTCACTGCATTCTAGTTGT  
GGTTTGTCCAAACTCATCAATGTATCTTATCATGTCTGGCCAGCTAGACGCGTGCTAGGCACGTCTAGGCACG  
TCTAGCTCGCGATCTTATGATCTGGATCCATGCTCGAGGCCTGTAGGCGGTACGGTGGGAGGCTTATATAA  
GCAGAGCTCAAGCTGGCATCCGGTACKTGAAGCCA CC

## Assembly PCR Promoters

### Promoter 1

ACSTCCCACACCTCCCCCTGAACCTGAAACATAAAATGAATGCAATTGTTGTTGTTAACTTGTTTATTGCAGCTT  
ATAATGGTTACAAATAAAGCAATAGCATCACAAATTTACAAATAAAGCATTTTTTTCACTGCATTCTAGTTGT  
GGTTTGTCCAAACTCATCAATGTATCTTATCATGTCTGGCCAGCTAGCGTGCCCTTATGATCTGGATGGGACT  
TTCCATCTCTGCGATGAACCTCACCTGAGTCAATGTCCTTATGATCTGGATCCATGATCTCTGCGATGAACCTC  
ACTGAGTCAATGATCTGGATGAGTCAATCTCTGCGATGAACCTCACGGGACTTTCCGTGCCTTATGATCT  
GGATGGGACTTTCCATCTCTGCGATGAACCTCACCTGAGTCAATGTCCTTATGATCTGGATGAGTCAATCTC  
GCGATGAACCTCACACGTGCCTGTCCTTATGATCTGGATGAGTCAATCTCTGCGATGAACCTCACACGTGC  
GTGCCTTATGATCTGGATACGTGCATCTCTGCGATGAACCTCACACGTGCCTGTCCTTATGATCTGGAT  
CTCGAGCCATGGTCGAGGCCTGTAGGCGGTACGGTGGGAGGCTTATATA AGCAGAGCTCAAGCTGGCAT

### Promoter 2

CAGCTTATAATGGTTACAAATAAAGCAATAGCATCACAAATTTACAAATAAAGCATTTTTTTCACTGCATTCTA  
GTTGTGGTTTGTCCAAACTCATCAATGTATCTTATCATGTCTGGCCAGCTAGCGTGCCTCTTATGATCTGGAT  
GAGTCAATCTC TCGATGAAC CTCAC TGAGT CA GTGCCTCT TATGATCTGGAT ACGTGC AT CTCTGCCGAT  
GAACCTCAC TGAGTCA GTGCCTCTTATGATCTGGAT ACGTGC ATCTCTGCGATGAACCTCAC TGAGTCA GTGC  
CTCTTATGATCTGGAT TGAGTCA ATCTCTGCGATGAACCTCAC TGAGTCA GTGCCTCTTATGATCTGGAT TGAG  
TCA ATCTCTGCGA TGAACCTCAC ACGTGC GTGCCTCTTATGATCTGGAT GGGACTTTCC ATCTCTGCGATGAA  
CCTCAC GGGACTTTCC GTGCCTCTTATGATCTGGAT GGGACTTTCC ATCTCTGCGATGAACCTCAC TGAGTCA G  
TGCCTCTTATGATCTGGAT CTCGAGCCATGGTCGAGGCCTGTAGGCGTGTACGGTGGGAGGCTTATATAAGC  
AGAG CTCAAGCTTGGCATCCGGTA CKKGAGCCMM CC

### Promoter 3

CATGTCTGGCCAGCTAGCGTGCCTCTTATGATCTGGAT ACGTGC ATCTCTGCGATGAACCTCAC GGGACTTTCC  
GTGCCTCTTATGATCTGGAT ACGTGC ATCTCTGCGATGAACCTCAC ACGTGC GTGCCTCTTATGATCTGGAT TG  
AGTCA ATCTCTGCGATGAACCTCAC GGGACTTTCC GTGCCTCTTATGATCTGGAT ACGTGC ATCTCTGCGATG  
AACCTCAC TGAGTCA GTGCCTCTTATGATCTGGAT ACGTGC ATCTCTGCGATGAACCTCAC ACGTGC GTGCCT  
CTTATGATCTGGAT CTCGAGCCATGGTCGAGGCCTGTAGGCGTGTACGGTGGGAGGCTTATATAAGCAGAGC  
TCAA GCTGGCATCC GGTACKTGAG CACTTT

### Promoter 4

CATTCTAGTTGTGGTTTGTCCAAACTCATCAATGTATCTTATCATGTCTGGCCAGCTAGCGTGCCTCTTATGATC  
TGGAT TGAGTCA ATCTCTGCGATGAACCTCAC TGAGTCA GTGCCTCTTATGATCTGGAT ACGTGC ATCTCTGC  
GATGAACCTCAC ACGTGC GTGCCTCTTATGATCTGGAT GGGACTTTCC ATCTCTGCGATGAACCTCAC ACGTGC  
GTGCCTCTTATGATCTGGAT GGGACTTTCC ATCTCTGCGATGAACCTCAC GGGACTTTCC GTGCCTCTTATGA  
TCTGGAT GGGACTTTCC ATCTCTGCGATGAACCTCAC TGAGTCA GTGCCTCTTATGATCTGGAT GGGACTTTCC  
ATCTCTGCGATGAACCTCAC GGGACTTTCC GTGCCTCTTATGATCTGGAT ACGTGC ATCTCTGCGATGAACCTC  
AC TGAGTCA GTGCCTCTTATGATCTGGAT ACGTGC ATCTCTGCGATGAACCTCAC TGAGTCA GTGCCTCTTATG  
ATCTGGAT CTCGAGCCATGGTCGAGGCCTGTAGGCGTGTACGGTGGGAGGCTTATATAAGCAGAGCTCAAGC  
T TGGCATCCGG

### Promoter 5

GCAATAGCGTCACAAATTTACAAATAAAGCATTTTTTTCACTKCRITSTAGTTGWGGTTTGTCCAAACTCATCA  
ATGTATCTTATCATGTCTGGCCAGCTAGCGTGCCTCTTATGATCTGGAT ACGTGC ATCTCTGCGATGAACCTCA  
CAC ACGTGC GTGCCTCTTATGATCTGGAT ACGTGC ATCTCTGCGATGAACCTCAC TGAGTCA GTGCCTCTTATGAT  
CTGGAT CTCGAGCCAWGGKSGAGGCCTGTAGGCGTGTACGGTGGGAGGCTTATATAAGCAGAGCTCAAGCT  
TGGCATCCGGTACTGT GARCCWYCTT



### Promoter 6

AAACTCATCAATGTATCTTATCATGTCTGGCCAGCTAGCGTGCCTMTTATRATCTGGAKTGAGTCAATCTCTGC  
GATGAACCTCACACGTGCGTGCCTCTTATGATCTGGATACGTGCGATCTTTGCGATGAACCTCACGGGACTTTCC  
CGTGCCTCTTATGATCTGGATACGTGCGATCTCTGCGATGAACCTCACACGTGCGTGCCTCTTATGATCTGGAT  
GGGACTTTCCATCTCTGCGATGAACCTCACACGTGCGTGCCTCTTATGATCTGGATGGGACTTTCCATCTCTGC  
GATGAACCTCACACGTGCGTGCCTCTTATGATCTGGATTGAGTCAATCTCTGCGATGARCSTCACACGTGCGT  
GCCTCTTATGATCTGGATCTCGAGCCATGGTSGAGGCCTGTAGGCGGTACGGTGGGAGGCTTATATAAGCA  
GAGCTCAAGCTGGCATTCCGGTAYKKGKYRRCCKCCTTYTG

### Promoter 9

TTCTAGTTGTGGTTTGTCCAAACTCATCAATGTATCTTATCATGTCTGGCCAGCTAGCGTGCCTCTTATGATCTG  
GATTGAGTCAATCTCTGCGATGAACCTCACACGTGCGTGCCTCTTATGATCTGGATGGGACTTTCCACCTCTGC  
GATGAACCTCACACGTGCGTGCCTCTTATGATCTGGATGGGACTTTCCATCTCTGCGATGAACCTCACTGAGT  
CAGTGCCTCTTATGATCTGGATTGAGTCAATCTCTGCGATGAACCTCACGGGACTTTCCGTGCCTCTTATGATC  
TGGATACGTGCGATCTCTGCGATGAACCTCACTGAGTCAATGCCTCTTATGATCTGGATGGGACTTTCCATCTCT  
GCGATGAACCTCACACGTGCGTGCCTCTTATGATCTGGATTGAGTCAATCTCTGCGATGAACCTCACACGTGCG  
GTGCCTCTTATGATCTGGATCTCGAGCCATGGTCGAGGCCTGTAGGCGGTACGGTGGGAGGCTTATATAAG  
CAGAGCTCAAGCTGGCATCCGGTACKTGAGMCMCC

### Promoter 11

GGTTTGTCCAAACTCATCAATGTATCTTATCATGTCTGGCCAGCTAGCGTGCCTCTTATGATCTGGATGGGACT  
TTCCATCTCTGCGATGAACCTCACTGAGTCAATGCCTCTTATGATCTGGATTGAGTCAATCTCTGCGATGAAC  
TCACACGTGCGTGCCTCTTATGATCTGGATACGTGCGATCTCTGCGATGAACCTCACGGGACTTTCCGTGCCTCT  
TATGATCTGGATGGGACTTTCCATCTCTGCGATGAACCTCACTGAGTCAATGCCTCTTATGATCTGGATCTCGA  
GCCATGGTCGAGGCCTGTAGGCGGTACGGTGGGAGGCTTATATAAGCAGAGCTCAAGCTGGCATCCGGTAC  
KK RAGRCCCC

### Promoter 12

CCAGCTAGCGTGCCTCTTATGATCTGGATTGAGTCAATCTCTGCGATGAACCTCAGGGGACTTTCCGTGCCTCT  
TATGATCTGGATGGGACTTTCCATCTCTGCGATGAACCTCACTGAGTCAATGCCTCTTATGATCTGGATTGAGT  
CAATCTCTGCGATGAACCTCACGGGACTTTCCGTGCCTCTTATGATCTGGATACGTGCGATCTCTGCGATGAA  
CCTCACGGGACTTTCCGTGCCTCTTATGATCTGGATCTCGAGCCATGGTCGAGGCCTGTAGGCGGTACGGTG  
GGAGGCTTATAAGCAGAGCTCAAGCTGGCATCCGGTACKTGAGACMCCCTC

### Promoter 13

RACSTCCRCACCTCCCCCTGAACCTGAAACATAAAATGAATGCAATTGTTGTTGTTAACTGTTTATTGCAGCT  
TATAATGGTTACAAATAAAGCAATAGCATCACAAATTTACAAATAAAGCATTTTTTTCACTGCATTCTAGTTGT  
GGTTTGCCAAACTCATCAATGTATCTTATCATGTCTGGCCAGCTAGCGTGCCTCTTATGATCTGGATACGTGC  
ATCTCTGCGATGAACCTCAC TGAGTCA GTGCCTCTTATGATCTGGATACGTGC ATCTCTGCGATGAACCTCAC  
GAGTCA GTGCCTCTTATGATCTGGAT TGAGTCA ATCTCTGCGATGAACCTCAC TGAGTCA GTGCCTCTTATGAT  
CTGGATGGGACTTTCC ATCTCTGCGATGAACCTCAC GGGACTTTCC GTGCCTCTTATGATCTGGAT TGAGTCA  
ATCTCTGCGATGAACCTCAC ACGTGC GTGCCTCTTATGATCTGGAT TGAGTCA ATCTCTGCGATGAACCTCAC  
GGGACTTTCC GTGCCTCTTATGATCTGGATCTCGAGCCATGGTCGAGGCCTGTAGGCGGTACGGTGGGAGG  
CTTATATAAGCAGAGCTCAA GCTGGCATCC GTACGTGARC CACCTC

### Promoter 14

AAACTCATCAATGTATCTTATCATGTCTGGCCAGCTAGCGTGCCTCTTATGATCTGGATGGGACTTTCC ATCTCT  
GCGATGAACCTCAC GGGACTTTCC GTGCCTCTTATGATCTGGAT TGAGTCA ATCTCTGCGATGAACCTCAC GG  
GACTTTCC GTGCCTCTTATGATCTGGAT ACGTGC ATCTCTGCGATGAACCTCAC ACGTGC GTGCCTCTTATGAT  
CTGGATGGGACTTTCC ATCTCTGCGATGAACCTCAC ACGTGC GTGCCTCTTATGATCTGGATCTCGAGCCATG  
GTCGAGGCCTGTAGGCGGTACGGTGGGAGGCTTATAAGCAGAGCTCAAGCTGGCATCCGGTACKTKRAA  
RCCCMCCC

### Promoter 15

ATTTACAAATAAAGCATTTTTTTCACTGCATTCTAGTTGTGGTTTGCCAAACTCATCAATGTATCTTATCATGT  
CTGGCCAGCTAGCGTGCCTCTTATGATCTGGATGGGACTTTCC ATCTCTGCGATGAACCTCAC GGGACTTTCC  
GTGCCTCTTATGATCTGGATCTCGAGCCATGGKCGAGGCCTGTAGGCGGTACGGTGGGAGGCTTATAAAG  
CAGAGCTCAAGCTGGCATCCGGTACTKTG

### Promoter 16

GTGTCYKGGCCCAGCTAGCGTGCCTCTTATGATYTGCGAT TGAGTCA ATCTCTGCGATGAACCTCAC GGGGRAC  
TTCC GTGCCTCTTATGATCTGGAT ACGTGC ATCTCTGCGATGAACCTCAC TGAGTCA GTGCCTCTTATGATC  
TGGAT ACGTGC ATCTCTGCGATGAACCTCAC ACGTGC GTGCCTCTTATGATCTGGAT TGAGTCA ATCTCTGCG  
ATGAACCTCAC TGAGTCA GTGCCTCTTATGATCTGGAT TGAGTCA ATCTCTGCGATGAACCTCAC GGGACTTT  
CC GTGCCTCTTATGATCTGGAT GGGACTTTCC ATCTCTGCGACCTCAC TGAGTCA GTGCCTCTTATGATCTGGA  
TGGGACTTTCC ATCTCTGCGATGAACCTCAC ACGTGC GTGCCTCTTATGATCTGGAT GGGACTTTCC ATCTCTG  
CGATGAACCTCAC GGGACTTTCC GTGCCTCTTATGATCTGGAT GGGACTTTCC ATCTCTGCGATGAACCTCAC  
GAGTCA GTGCCTCTTATGATCTGGAT ACGTGC ATCTCTGCGATGAACCTCAC ACGTGC GTGCCTCTTATGATCT  
GGAT ACGTGC ATCTCTGCGATGAACCTCAC GGGACTTTCC GTGCTCTTATGATCTGGAT ACGTGC ATCTCTGC  
GATGAACCTCAC ACGTGC GTGCCTCTTATGATCTGGAT GGGC ATCTCTGCGATGAACCTCAC ACGTGC GTGCC  
TCTTATGATCTGGATCTCGAGCCATGGTCGAGGCCTGTAGGCGGTACGGTGGGAGGCTTATAAAGCAGAG  
CTC AAGCTTGGA TCCGGTACCK TGAGCMCCC

### Promoter 17

GAGATCYTSYCACACCTCCCCCTGARCYTGAAACATAAAAATGAATGCAATTGTTGTTGTTAACTTRTTTTATTGCA  
GCTTATAATGGTTACAAATAAAGCAATAGCATCACAAATTTACAAATAAAGCATTTTTTTCACTGCATTCTAGT  
TGTGGTTTGTCCAAACTCATCAATGTATCTTATCATGTCTGGCCAGCTAGCGTGCCTCTTATGATCTGGATACG  
TGCATCTCTGCGATGAACCTCAC TGAGTCA GTGCCTCTTATGATCTGGAT ACGTGC ATCTCTGCGATGAACCTC  
ACTGAGTCA GTGCCTCTTATGATCTGGAT TGAGTCA ATCTCTGCGATGAACCTCAC GGGACTTTCC GTGCCTCT  
TATGATCTGGATCTCGAGCCATGGTSGAGGCCTGTAGGCGGTACGGTGGGAGGCTTATATAAGCAGAGCTA  
AGCTTGGCATCCGTACYGTTGAGRCMMCCCCA

### Promoter 18

TGTATCTTATCATGTCTGGCCAGSTAGCGTGCCTCTTATGATCTGGATGGGACTTTCCATCTCTGCGATGAACC  
TCACACGTGCGTGCCTCTTATGATCTGGATGGGACTTTCCATCTCTGCGATGAACCTCACGGGACTTTCCGTGC  
CTCTTATGATCTGGAT TGAGTCA ATCTCTGCGATGAACCTCACGGGACTTTCCGTGCCTCTTATGATCTGGATG  
GGACTTTCCATCTCTGCGATGAACCTCACACGTGCGTGCCTCTTATGATCTGGATCTCGAGCCATGGTTCGAGG  
CCTGTAGGCGGTACGGTGGGAGGCTTATATAAGCAGAGCTCAAGCTGGCATCCGGTACKTTAGCACTGGCA

### Promoter 19

TGTCCAAACTCATCAATGTATCTTATCATGTCTGGCCAGCTAGCGTGCCTCTTATGATCTGGAT TGAGTCA ATCT  
CTGCGATGAACCTCACGGGACTTTCCGTGCCTCTTATGATCTGGAT ACGTGC ATCTCTGCGATGAACCTCAC  
GAGTCA GTGCCTCTTATGATCTGGAT GGGACTTTCC ATCTCTGCGATGAACCTCAC TGAGTCA GTGCCTCTTAT  
GATCTGGAT GGGACTTTCC ATCTCTGCGATGAACCTCAC ACGTGC GTGCCTCTTATGATCTGGAT GGGACTTT  
CC ATCTCTGCGATGAACCTCAC TGAGTCA GTGCCTCTTATGATCTGGAT ACGTGC ATCTCTGCGATGAACCTCA  
CACGTGCGTGCCTCTTATGATCTGGATCTCGAGCCATGGTTCGAGGCCTGTAGGCGGTACGGTGGGAGGCTT  
ATATAAGCAGAGCTCAAGCTGGCATCCGGTACKTGAGCA CTTG

### Promoter 20

GTATCTTATCATGTCTGGCCAGCTAGCGTGCCTCTTATGATCTGGAT TGAGTCA ATCTCTGCGATGAACCTCAC  
TGAGTCA GTGCCTCTTATGATCTGGAT GGGACTTTCC ATCTCTGCGATGAACCTCAC ACGTGC GTGCCTCTTAT  
GATCTGGAT ACGTGC ATCTCTGCGATGAACCTCAC TGAGTCA GTGCCTCTTATGATCTGGATCTCGAGCCAWG  
RTSGAGGCCTGTAGGCGGTACGGTGGGARGCTTATATAAGCAGAGCTCAAGCTTKGCWTTCCGKAAYCTRY  
GTTKKA
